# Supplementary material
Source: HighWire-hosted journal article supplement (https://cmajopen.ca/highwire/filestream/90746/field_highwire_adjunct_files/0/open-2022-0181-1-at.pdf)
Supplement: open-2022-0181-1-at.pdf [file open-2022-0181-1-at.pdf]

## Appendix 1 – Data sources information

| Name                                                      | Description                                                                                                                                                                                                                                                                                                                                        | Refer to                                                                                                                                  |
|-----------------------------------------------------------|----------------------------------------------------------------------------------------------------------------------------------------------------------------------------------------------------------------------------------------------------------------------------------------------------------------------------------------------------|-------------------------------------------------------------------------------------------------------------------------------------------|
| Discharge Abstract Database (DAD)                         | Demographic, administrative and clinical data for hospital discharges and day surgeries. All Canadian hospitals (except those in Quebec) submit their separations records for inclusion in the DAD.                                                                                                                                                | <a href="https://www.popdata.bc.ca/data/health/dad">https://www.popdata.bc.ca/data/health/dad</a>                                         |
| National Ambulatory Care Reporting System (NACRS) dataset | Data on ambulatory care within Canada including emergency departments (EDs), day surgery, and medical and surgical day clinics within hospitals, the community and private clinics. Presently there are 29 hospital EDs in the province reporting to NACRS and no ambulatory care facility is reporting in BC.                                     | <a href="https://www.popdata.bc.ca/data/health/nacrs">https://www.popdata.bc.ca/data/health/nacrs</a>                                     |
| Medical Services Plan (MSP) payment file                  | Data on medically necessary services provided by fee-for-service practitioners to individuals covered by the MSP, BC's universal insurance program. Practitioners are separated into: physicians, supplementary benefit practitioners (physiotherapists, massage practitioners, naturopathic physicians, etc.), and out-of-province practitioners. | <a href="https://www.popdata.bc.ca/data/health/msp">https://www.popdata.bc.ca/data/health/msp</a>                                         |
| BC Vital Events and Statistics Deaths dataset             | Includes all deaths registered in the province of BC.                                                                                                                                                                                                                                                                                              | <a href="https://www.popdata.bc.ca/data/demographic/vs_deaths">https://www.popdata.bc.ca/data/demographic/vs_deaths</a>                   |
| PharmaNet dataset                                         | Data on all prescriptions for drugs and medical supplies dispensed from community pharmacies in BC as well as prescriptions dispensed from hospital outpatient pharmacies for patient use at home.                                                                                                                                                 | <a href="https://www.popdata.bc.ca/data/health/pharmanet">https://www.popdata.bc.ca/data/health/pharmanet</a>                             |
| Consolidation File dataset                                | Population Data BC's central demographics file for research requests. Contains basic demographics such as age and sex, geo-codes indicating location of residence, and registration data.                                                                                                                                                          | <a href="https://www.popdata.bc.ca/data/demographic/consolidation_file">https://www.popdata.bc.ca/data/demographic/consolidation_file</a> |
